# Supplementary material for: Maternal Selenium-Enriched Yeast Supplementation in Sows Enhances Offspring Growth and Antioxidant Status through the Nrf2/Keap1 Pathway
Source: MDPI journal article supplement (doi:10.3390/antiox12122064), 2023-12-01
Supplement: s1 [file s1]

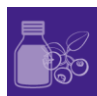

Article

# Maternal Selenium-Enriched Yeast Supplementation in Sows Enhances Offspring Growth and Antioxidant Status through the Nrf2/Keap1 Pathway

Liang Xiong <sup>1</sup>, Tongbin Lin <sup>1</sup>, Xianhuai Yue <sup>1</sup>, Shuchang Zhang <sup>1</sup>, Xinghong Liu <sup>1</sup>, Fang Chen <sup>1</sup>, Shihai Zhang <sup>1,2,3,\*</sup> and Wutai Guan <sup>1,2,3,\*</sup>

<sup>1</sup> Guangdong Provincial Key Laboratory of Animal Nutrition Control, College of Animal Science, South China Agricultural University, Guangzhou 510642, China; 244628426@stu.scau.edu.cn (L.X.); 13616905519@stu.scau.edu.cn (T.L.); yxh@stu.scau.edu.cn (X.Y.); zsc0722@stu.scau.edu.cn (S.Z.); lxh@stu.scau.edu.cn (X.L.); chenfang1111@scau.edu.cn (F.C.)

<sup>2</sup> National Engineering Research Center for Breeding Swine Industry, South China Agricultural University, Guangzhou 510642, China

<sup>3</sup> Guangdong Laboratory for Lingnan Modern Agriculture, South China Agricultural University, Guangzhou 510642, China

\* Correspondence: zhangshihai@scau.edu.cn (S.Z.); wtguan@scau.edu.cn (W.G.)

**Table S1** Ingredient composition and nutritional levels of the basic diet (air-dried basis; %)

|                                                   | Pregnant diet | Lactating diet |
|---------------------------------------------------|---------------|----------------|
| Ingredients                                       |               |                |
| Corn                                              | 20.50         | 34.10          |
| Soybean meal                                      | 16.50         | 15.00          |
| Wheat                                             | 16.00         | 12.00          |
| Barley                                            | 26.90         | 8.00           |
| Extruded soybean                                  | -             | 20.00          |
| Soybean sheet                                     | 15.00         | 3.00           |
| Fish meal                                         | 0.80          | 2.50           |
| Soybean oil                                       | 0.60          | 1.80           |
| Dicalcium phosphate                               | 1.40          | 1.20           |
| Limestone                                         | 0.50          | 0.70           |
| Salt                                              | 0.50          | 0.50           |
| Pregnant vitamin and mineral premix <sup>a</sup>  | 1.20          |                |
| Lactating vitamin and mineral premix <sup>b</sup> |               | 1.10           |
| Mold inhibitor                                    | 0.10          | 0.10           |
| Total                                             | 100.00        | 100.00         |
| Nutritional levels <sup>c</sup>                   |               |                |
| Digestible energy, MJ/kg                          | 3050          | 3410           |
| Metabolic energy, MJ/kg                           | 2840          | 3200           |
| Dry matter, %                                     | 87            | 87             |
| Crude protein, %                                  | 13.9          | 17.5           |
| Ash, %                                            | 0.76          | 1.1            |
| Crude fiber, %                                    | 0.23          | 0.30           |
| Crude fat, %                                      | 0.48          | 0.60           |
| Calcium, %                                        | 0.53          | 0.72           |
| Phosphorus, %                                     | 5.52          | 5.30           |
| Available phosphorus                              | 0.8           | 0.8            |
| Digestible Lys, % <sup>c</sup>                    | 0.6           | 0.6            |
| Digestible Met + Cys                              | 8.30          | 3.96           |
| Digestible Thr, % <sup>c</sup>                    | 2.45          | 5.21           |
| Digestible Trp, % <sup>c</sup>                    | 15            | 15             |
| Se, mg/kg                                         | 0.34          | 0.37           |

<sup>a</sup> Pregnant vitamin and mineral premix provide per kg of complete diet: 13,000 IU vitamin A, 4000 IU vitamin D<sub>3</sub>, 30 IU vitamin E, 4 mg vitamin K<sub>3</sub>, 4 mg vitamin B<sub>1</sub>, 10 mg vitamin B<sub>2</sub>, 4.8 mg vitamin B<sub>6</sub>, 0.034 mg vitamin B<sub>12</sub>, 0.14 mg I (CaI<sub>2</sub>O<sub>6</sub>), 0.3 mg Se (Na<sub>2</sub>SeO<sub>3</sub>), 40 mg niacin, 20 mg D-pantothenate, 2.0 mg folic acid, 0.16 mg D-biotin, 80.0 mg Zn (ZnSO<sub>4</sub>·H<sub>2</sub>O), 100.0 mg Fe (FeSO<sub>4</sub>·H<sub>2</sub>O), 45.0 mg Mn (MnSO<sub>4</sub>·H<sub>2</sub>O), 15.0 mg Cu (CuSO<sub>4</sub>·5H<sub>2</sub>O).

<sup>b</sup> Lactating vitamin and mineral premix provide per kg of complete diet: 13,000 IU vitamin A, 4000 IU vitamin D<sub>3</sub>, 30 IU vitamin E, 4 mg vitamin K<sub>3</sub>, 4 mg vitamin B<sub>1</sub>, 10 mg vitamin B<sub>2</sub>, 4.8 mg vitamin B<sub>6</sub>, 0.034 mg vitamin B<sub>12</sub>, 0.14 mg I (CaI<sub>2</sub>O<sub>6</sub>), 0.3 mg Se (Na<sub>2</sub>SeO<sub>3</sub>), 40 mg niacin, 20 mg D-pantothenate, 2.0 mg folic acid, 0.16 mg D-biotin, 80.0 mg Zn (ZnSO<sub>4</sub>·H<sub>2</sub>O), 100.0 mg Fe (FeSO<sub>4</sub>·H<sub>2</sub>O), 45.0 mg Mn (MnSO<sub>4</sub>·H<sub>2</sub>O), 15.0 mg Cu (CuSO<sub>4</sub>·5H<sub>2</sub>O).

<sup>c</sup> Calculated values according to the tables of feed composition and nutritive values.
